# Supplementary material for: Holographic reconstruction technology used for intraoperative real-time navigation in robot-assisted partial nephrectomy in patients with renal tumors: a single center study
Source: PubMed Central journal article supplement — Transl Androl Urol. 2021 Aug;10(8):3386–94. doi: 10.21037/tau-21-473 (PMC8421827; doi:10.21037/tau-21-473), 2021-08
Supplement: tau-10-08-3386-dss.pdf [file tau-10-08-3386-dss.pdf]

## Data Sharing Statement

|                     |                                                                                                                                                     |                                                                                                                                                                                                                        |
|---------------------|-----------------------------------------------------------------------------------------------------------------------------------------------------|------------------------------------------------------------------------------------------------------------------------------------------------------------------------------------------------------------------------|
| <b>Article Info</b> | <a href="https://dx.doi.org/10.21037/tau-21-473">https://dx.doi.org/10.21037/tau-21-473</a>                                                         |                                                                                                                                                                                                                        |
| <b>Item</b>         | <b>Question</b>                                                                                                                                     | <b>Authors' Response<br/>(place "-" if not applicable)</b>                                                                                                                                                             |
| 1                   | Would you like to share data collected for your study to others?                                                                                    | Yes                                                                                                                                                                                                                    |
| 2                   | If not, would you like to share the reason for your decision?                                                                                       | -                                                                                                                                                                                                                      |
| 3                   | What data in particular will be shared?                                                                                                             | The survival data in particular will be shared, and we also found The use of HR in RAPN resulted in shorter surgery time, shorter tumor resection time, and improved precision and rapid location of surgical targets. |
| 4                   | Any other documents will be shared? Such as study protocol, statistical analysis plan, informed consent form, clinical study report, analytic code. | Statistical analysis plan, informed consent form, and clinical study report will also be shared if requested.                                                                                                          |
| 5                   | When will data availability begin?                                                                                                                  | From the publication date                                                                                                                                                                                              |
| 6                   | When will data availability end?                                                                                                                    | Two years within the publication date, since the technique or survival date may be updated over time.                                                                                                                  |
| 7                   | To whom will you share the data?                                                                                                                    | Urology surgeons who are interested in studies of Holographic reconstruction technology                                                                                                                                |
| 8                   | For what type of analysis or purpose?                                                                                                               | For analysis to evaluate the safer and more effective in patients with renal tumors compared with RAPN not used holographic reconstruction.                                                                            |
| 9                   | How or where can the data/documents be obtained?                                                                                                    | Emails could be sent to the address below to obtain the shared data:<br>zeng.shaohua2008@163.com.                                                                                                                      |

|    |                                                     |                                                                                                                        |
|----|-----------------------------------------------------|------------------------------------------------------------------------------------------------------------------------|
| 10 | Any other restrictions?<br>对于您的共享数据是否还有<br>要求 / 说明? | We may balance the potential benefits and risks<br>for each request and then provide the data that<br>could be shared. |
|----|-----------------------------------------------------|------------------------------------------------------------------------------------------------------------------------|
